# Supplementary material for: A CRISPR/dCas9 toolkit for functional analysis of maize genes
Source: PubMed Central journal article supplement (PMC7532566; doi:10.1186/s13007-020-00675-5), 2020-10-02
Supplement: 13007_2020_675_MOESM2_ESM.pdf [file 13007_2020_675_MOESM2_ESM.pdf]

**Additional File 1.** gRNA sequences used in this study

| <b>Maize gRNA targets</b>      | <b>5' – 3' sequence</b>                                                       |                                                                                                |
|--------------------------------|-------------------------------------------------------------------------------|------------------------------------------------------------------------------------------------|
| <i>PDS1</i><br><i>promoter</i> | gRNA1<br>gRNA2<br>gRNA3<br>gRNA4                                              | tctcgtcactatgtattccg<br>cgggtagcggatatacca<br>tgtattccgcgcatcacac<br>tctgttgctaaggtaatatg      |
| <i>ChlH</i><br><i>promoter</i> | gRNA1<br>gRNA2<br>gRNA3<br>gRNA4                                              | acactattataattatgcaa<br>gatcaatcgcacagttaggg<br>ccaagcctctgccctcgacg<br>tctcctcctccaggagacga   |
| <i>TrxH</i><br><i>promoter</i> | gRNA1<br>gRNA2<br>gRNA3<br>gRNA4                                              | tgtcgtcccagcctgaaaaa<br>gtacgtacaagctcaciaaag<br>cagctaggatgaatgcaacca<br>gcggtattatgtctcggtag |
|                                |                                                                               |                                                                                                |
| <b>gRNA scaffold</b>           | gttttagagctagaaatagcaagttaaaataaggctagtcggtatcaactgaaaaagtggcaccgagtcggtgc    |                                                                                                |
| <b>tRNA</b>                    | aacaaagcaccagtgggtctagtggtagaatagtaccctgccacggtacagaccgggttcgattcccggctggtgca |                                                                                                |
