# Supplementary material for: A CRISPR/dCas9 toolkit for functional analysis of maize genes
Source: PubMed Central journal article supplement (PMC7532566; doi:10.1186/s13007-020-00675-5), 2020-10-02

**A**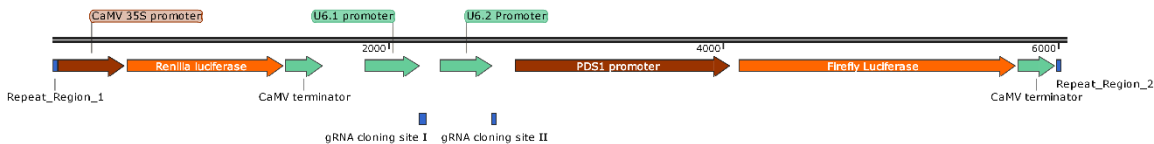**B**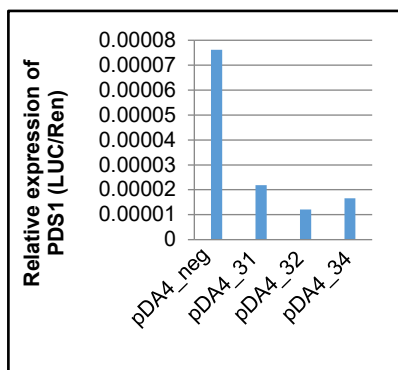**C**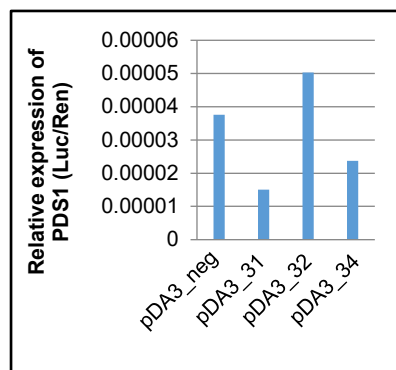**D**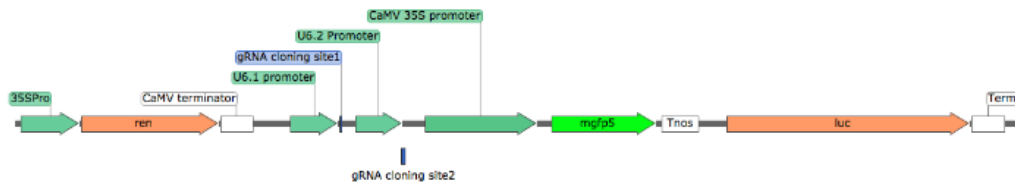**E**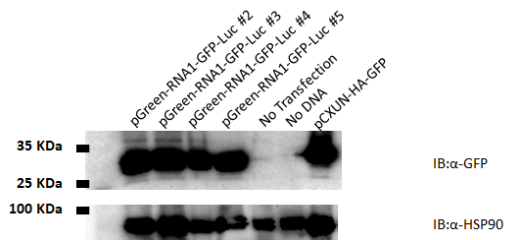

Supplement: 13007_2020_675_MOESM3_ESM.pdf [file 13007_2020_675_MOESM3_ESM.pdf]
